# Supplementary material
Source: publisher figshare collection journal article supplement (https://karger.figshare.com/ndownloader/files/15050591)
Supplement: Supplementary file 1 [file 15050591]

## Sheet: Sheet1
GI	Accession Number	Protein Name	Mean NSAF Uninfected	Mean NSAF UPEC	p-value	Significant
31560790	NP_061350.2	1-acylglycerol-3-phosphate O-acyltransferase 1	4.153e-05	0	0.248864	no
31982169	NP_780386.2	3-hydroxybutyrate dehydrogenase, type 1	0	2.92413e-05	0.0277078	yes
31543976	NP_061359.2	3-monooxgenase/tryptophan 5-monooxygenase activation protein, gamma polypeptide	0	0.000127277	0.0277078	yes
6754900	NP_035981.1	5' nucleotidase, ecto	4.07598e-05	0.000133711	0.248864	no
27369650	NP_766068.1	5-methyltetrahydrofolate-homocysteine methyltransferase reductase	1.88447e-05	0	0.248864	no
29126205	NP_803421.1	acetyl-Coenzyme A acyltransferase 2 (mitochondrial 3-oxoacyl-Coenzyme A thiolase)	0	0.000118904	0.0277078	yes
31982355	NP_032090.2	acid alpha-glucosidase	0.000171265	0	0.248864	no
6680624	NP_031414.1	acid phosphatase 5, tartrate resistant	4.01098e-05	5.71097e-05	0.0277078	yes
114431242	NP_065586.3	acid sphingomyelinase-like phosphodiesterase 3a	8.22327e-05	0.000109902	0.0277078	yes
18079339	NP_542364.1	aconitase 2, mitochondrial	0	5.37393e-05	0.0277078	yes
112363072	NP_083987.1	actin related protein 2/3 complex, subunit 2	0	3.66444e-05	0.0277078	yes
13386054	NP_080828.1	actin related protein 2/3 complex, subunit 4	0	0.000167817	0.0277078	yes
33563240	NP_033736.1	actin, alpha 1, skeletal muscle	0.000987807	0.00123299	0.345448	no
6671507	NP_031418.1	actin, alpha 2, smooth muscle, aorta	0.000393156	0.0001458	0.345448	no
14192922	NP_033738.1	actin, alpha, cardiac	0	0.000594425	0.0277078	yes
6671509	NP_031419.1	actin, beta, cytoplasmic	0.0108754	0.0259683	0.248864	no
6752954	NP_033739.1	actin, gamma, cytoplasmic 1	0.00341595	0.0178948	0.345448	no
38016178	NP_848803.2	actin-binding LIM protein 1	0	5.74405e-05	0.0277078	yes
11230802	NP_068695.1	actinin alpha 4	0.000300653	0.00333937	0.172955	no
61097906	NP_598917.1	actinin, alpha 1	0.000123524	0.00231163	0.0277078	yes
22122825	NP_666355.1	actin-related protein 2	0	0.000123503	0.0277078	yes
31982520	NP_031407.2	acyl-Coenzyme A dehydrogenase, long-chain	0	7.83958e-05	0.0277078	yes
6680618	NP_031408.1	acyl-Coenzyme A dehydrogenase, medium chain	0.000503774	0.000171724	0.172955	no
6680636	NP_031424.1	adenosine deaminase	0	1.91578e-05	0.0277078	yes
6671519	NP_031447.1	adenylosuccinate synthetase 1	0	1.95278e-05	0.0277078	yes
7304867	NP_038487.1	adipsin	0.0158346	0.00811876	0.248864	no
6680716	NP_031502.1	ADP-ribosylation factor 1	0	5.78959e-05	0.0277078	yes
6680718	NP_031504.1	ADP-ribosylation factor 3	7.24636e-05	0.000135867	0.248864	no
6680722	NP_031506.1	ADP-ribosylation factor 5	0	0.000212532	0.0277078	yes
6678664	NP_032512.1	alanyl (membrane) aminopeptidase	0.00172312	0.00189786	0.916512	no
33859506	NP_033784.1	albumin	0.00859867	0.0148599	0.753152	no
6724311	NP_031435.1	alcohol dehydrogenase 1 (class I)	0	2.79444e-05	0.0277078	yes
27532959	NP_081682.1	aldehyde dehydrogenase 1 family, member L1	5.2488e-05	0.000149544	0.0277078	yes
6753036	NP_033786.1	aldehyde dehydrogenase 2, mitochondrial	5.0543e-05	0.000172209	0.248864	no
30520135	NP_848828.1	aldehyde dehydrogenase 8 family, member A1	4.8608e-05	0.000141895	0.0277078	yes
19527258	NP_598803.1	aldehyde dehydrogenase family 6, subfamily A1	1.41749e-05	0	0.248864	no
31981909	NP_033788.2	aldo-keto reductase family 1, member B3 (aldose reductase)	3.74559e-05	7.3516e-05	0.248864	no
6671539	NP_031464.1	aldolase 1, A isoform	0.000216196	0.00245295	0.0277078	yes
21450291	NP_659152.1	aldolase 2, B isoform	0.000608113	0.000951827	0.600179	no
6671533	NP_031457.1	alkaline phosphatase 2, liver	0.000800025	0.00296007	0.0277078	yes
6680684	NP_031469.1	alpha 1 microglobulin/bikunin	0.000377454	0.000716988	0.248864	no
6679891	NP_032086.1	alpha glucosidase 2 alpha neutral subunit	0	6.44405e-06	0.0277078	yes
7304875	NP_038493.1	alpha-2-HS-glycoprotein	0	0.000144551	0.0277078	yes
7305299	NP_038820.1	alpha-N-acetylglucosaminidase	7.98184e-05	0	0.172955	no
22095013	NP_083914.1	amiloride binding protein 1 (amine oxidase, copper-containing)	0.000313281	0.000527105	0.0277078	yes
13384746	NP_079647.1	aminoacylase 1	0.000388564	0.000103208	0.0463995	yes
6754408	NP_035964.1	aminoadipate aminotransferase	0.000453387	0.000259594	0.600179	no
28077083	NP_291081.2	amnionless	0.000129215	8.75962e-05	0.248864	no
6996909	NP_031472.1	amylase 1, salivary	0.00572589	0.00115745	0.248864	no
7304901	NP_038504.1	androgen receptor	0	1.22284e-05	0.0277078	yes
31982508	NP_031452.2	angiopoietin 2	2.3863e-05	0	0.248864	no
46559389	NP_997507.1	angiotensin I converting enzyme (peptidyl-dipeptidase A) 1 isoform 1	0.000457797	5.28512e-05	0.0747355	no
83582782	NP_081562.2	angiotensin I converting enzyme (peptidyl-dipeptidase A) 2	2.16162e-05	2.88584e-05	0.248864	no
33469015	NP_082519.1	angiotensinase C like	0.000143448	5.55897e-05	0.345448	no
113461998	NP_031454.3	angiotensinogen	8.51738e-05	1.29148e-05	0.172955	no
124517663	NP_034860.2	annexin A1	0.000754909	0.00624873	0.0747355	no
7304885	NP_038497.1	annexin A11	0.0014956	0.000863513	0.916512	no
6996913	NP_031611.1	annexin A2	0.000871254	0.00385082	0.0277078	yes
7304887	NP_038498.1	annexin A3	0	0.00041378	0.0277078	yes
7304889	NP_038499.1	annexin A4	0.000111311	0.000429659	0.0277078	yes
6753060	NP_033803.1	annexin A5	0.000111311	0.000766838	0.0277078	yes
31981302	NP_038500.2	annexin A6	0.00017587	0.000320361	0.172955	no
6753062	NP_033804.1	annexin A7	8.16128e-05	0.000173974	0.753152	no
32189436	NP_473382.1	anthrax toxin receptor 1	2.33379e-05	0	0.248864	no
75677437	NP_031496.2	apolipoprotein D	0.000956277	4.85638e-05	0.115851	no
6753102	NP_033826.1	apolipoprotein E	0.000114174	2.00159e-05	0.345448	no
94400779	NP_038503.3	apolipoprotein H	6.80512e-05	0.000225368	0.248864	no
7106255	NP_031508.1	arginase 1, liver	0.000210219	0.00291092	0.0463995	yes
6996911	NP_031520.1	argininosuccinate synthetase	0	6.19024e-05	0.0277078	yes
23956222	NP_076224.1	ARP3 actin-related protein 3 homolog	6.27555e-05	0.00105452	0.0277078	yes
30410732	NP_848495.1	arrestin domain containing 1	0	1.43763e-05	0.0277078	yes
31982632	NP_082133.2	aspartoacylase-3	0	3.15402e-05	0.0277078	yes
28974984	NP_803228.1	aspartyl-tRNA synthetase	0	2.09165e-05	0.0277078	yes
31980648	NP_058054.2	ATP synthase, H+ transporting mitochondrial F1 complex, beta subunit	0.000492938	0.00056947	0.345448	no
6680748	NP_031531.1	ATP synthase, H+ transporting, mitochondrial F1 complex, alpha subunit, isoform 1	0.000456323	0.00050446	0.463071	no
6753144	NP_033859.1	ATPase, H+ transporting, lysosomal V0 subunit C	0.000306858	0	0.172955	no
31560731	NP_031534.2	ATPase, H+ transporting, lysosomal V1 subunit A	7.67329e-05	8.27225e-05	0.345448	no
13384916	NP_079770.1	ATPase, H+ transporting, lysosomal V1 subunit C1	0	1.76533e-05	0.0277078	yes
116292744	NP_839990.2	ATP-binding cassette transporter	8.01958e-05	0.000223944	0.753152	no
6752944	NP_036050.1	ATP-binding cassette, sub-family G, member 2	5.40459e-05	0	0.248864	no
21312406	NP_082397.1	ATP-dependent glucokinase	5.4864e-05	0.000449314	0.115851	no
31542164	NP_033491.2	AXL receptor tyrosine kinase	0	3.01788e-05	0.0277078	yes
34915988	NP_033898.1	basigin isoform 1	3.04269e-05	0	0.248864	no
126723336	NP_031557.2	B-cell receptor-associated protein 37	0	3.50473e-05	0.0277078	yes
30039682	NP_780592.1	beta-1,3-N-acetylglucosaminyltransferase bGnT-6	2.85206e-05	0	0.248864	no
13384648	NP_079571.1	biotinidase	0.000147226	6.2344e-05	0.248864	no
30519997	NP_848760.1	bleomycin hydrolase	0	2.30311e-05	0.0277078	yes
134288869	NP_033893.2	bone marrow stromal cell antigen 1	7.61161e-05	0	0.248864	no
6753374	NP_033994.1	cadherin 1	0.00154361	0.00212243	0.345448	no
31541826	NP_081184.3	calcium binding protein 39-like	4.39821e-05	0	0.248864	no
27369998	NP_766273.1	calcium-binding transporter	0	5.67879e-05	0.0277078	yes
6671664	NP_031623.1	calnexin	0	8.86561e-05	0.0277078	yes
6671668	NP_031626.1	calpain 1	0	2.87643e-05	0.0277078	yes
6680836	NP_031617.1	calreticulin	5.64367e-05	0.000166821	0.248864	no
6671666	NP_031624.1	CAP, adenylate cyclase-associated protein 1	0	1.52637e-05	0.0277078	yes
33468887	NP_033927.1	capping protein (actin filament) muscle Z-line, alpha 1	0	2.17656e-05	0.0277078	yes
13385334	NP_085035.1	carbonic anhydrase 15	0.00030046	0.000171137	0.916512	no
6753270	NP_033932.1	carbonic anhydrase 6	0	5.32853e-05	0.0277078	yes
85719301	NP_001034275.1	carcinoembryonic antigen-related cell adhesion molecule 1 isoform 2	0	1.5797e-05	0.0277078	yes
85719313	NP_001034276.1	carcinoembryonic antigen-related cell adhesion molecule 1 isoform 4	0	0.000154478	0.0277078	yes
27734196	NP_775561.1	cartilage intermediate layer protein, nucleotide pyrophosphohydrolase	1.18576e-05	0	0.248864	no
6753272	NP_033934.1	catalase	4.45496e-05	0	0.248864	no
6681079	NP_031824.1	cathepsin B preproprotein	0.000326771	0.000616627	0.0747355	no
31560607	NP_034112.2	cathepsin C preproprotein	0	1.34739e-05	0.0277078	yes
6753556	NP_034113.1	cathepsin D	0.000475427	0.000659008	0.248864	no
6681081	NP_031825.1	cathepsin E preproprotein	0.00104034	0.000391511	0.0747355	no
6681083	NP_031826.1	cathepsin G preproprotein	0.000134611	8.57e-05	0.345448	no
7106279	NP_031827.1	cathepsin H	0	5.60806e-05	0.0277078	yes
6753558	NP_034114.1	cathepsin L preproprotein	3.92692e-05	0.000180003	0.0277078	yes
29244082	NP_808330.1	cathepsin O	4.20382e-05	2.31891e-05	0.248864	no
6753332	NP_033971.1	CD14 antigen	0	0.000254671	0.0277078	yes
34328436	NP_081138.2	CD177 antigen	7.57098e-05	0.00080007	0.0277078	yes
85540471	NP_033981.2	CD44 antigen isoform a	2.93826e-05	0.00011902	0.115851	no
29789245	NP_084032.1	centrosomal colon cancer autoantigen	0	2.86038e-05	0.0277078	yes
124487017	NP_001074842.1	centrosomal protein 164	8.91632e-06	0	0.248864	no
110815853	NP_001036076.1	ceruloplasmin isoform a	0.000371257	0.000242491	0.345448	no
33468847	NP_031721.1	chitinase 3-like 1	0.00020655	0.000319888	0.0277078	yes
6753416	NP_034022.1	chitinase 3-like 3	0.000485976	0.00507727	0.0277078	yes
21553079	NP_660108.1	chitinase 3-like 4	0	0.00144634	0.0277078	yes
27229204	NP_083112.1	chitobiase, di-N-acetyl-	0	1.21129e-05	0.0277078	yes
13447394	NP_085104.1	chloride channel calcium activated 2	0	3.65632e-05	0.0277078	yes
8567336	NP_059502.1	chloride channel calcium activated 3	0.00569407	0.00733642	0.0463995	yes
12963737	NP_076054.1	chromosome segregation 1-like	0	7.45108e-06	0.0277078	yes
13385942	NP_080720.1	citrate synthase	5.65341e-05	0.000230616	0.115851	no
7304967	NP_038520.1	clusterin	0.0102177	0.00548973	0.916512	no
31981273	NP_075638.2	CNDP dipeptidase 2 (metallopeptidase M20 family)	0.000168931	0.000465221	0.248864	no
31560592	NP_034301.2	coagulation factor III	0	0.000111219	0.0277078	yes
32441279	NP_795999.2	Cobl-like 1	0	8.86558e-06	0.0277078	yes
126518317	NP_033908.2	complement component 3	0.00218642	0.00671022	0.0277078	yes
109627652	NP_034018.2	complement component factor H	0.000410241	0.000831518	0.0277078	yes
6996919	NP_032224.1	complement factor B	0.00116175	0.00149721	0.0277078	yes
71361676	NP_001020746.1	complement factor H-related protein B	2.52747e-05	0.000617246	0.0277078	yes
6753490	NP_036131.1	COP9 signalosome subunit 4	0	2.19808e-05	0.0277078	yes
58037333	NP_082995.1	copine IV	2.12496e-05	0	0.248864	no
113374158	NP_001008424.2	corneodesmosin	0	3.18154e-05	0.0277078	yes
6753492	NP_034028.1	coronin, actin binding protein 1A	2.8451e-05	6.00812e-05	0.0277078	yes
6753428	NP_034027.1	creatine kinase, mitochondrial 1, ubiquitous	3.35337e-05	0.000276002	0.172955	no
124487348	NP_001074553.1	cubilin (intrinsic factor-cobalamin receptor)	8.53642e-06	0	0.248864	no
21450351	NP_659191.1	cysteine sulfinic acid decarboxylase	7.72168e-05	4.06887e-05	0.345448	no
47059022	NP_034191.2	deoxyribonuclease I	0.00550111	0.00191928	0.0747355	no
31981297	NP_038532.2	desmocollin 1	4.27504e-05	0.000818206	0.0277078	yes
7305007	NP_038533.1	desmocollin 2	0	0.000200743	0.0277078	yes
133778947	NP_031908.3	desmocollin 3	0	9.96006e-06	0.0277078	yes
32129201	NP_859010.1	desmoglein 1 beta	0	0.000252632	0.0277078	yes
110625833	NP_085099.2	desmoglein 3	0	1.4572e-05	0.0277078	yes
9790219	NP_062745.1	destrin	0	0.000244616	0.0277078	yes
6753674	NP_034204.1	dipeptidylpeptidase 4	0	1.44649e-05	0.0277078	yes
31981425	NP_114031.2	dipeptidylpeptidase 7	0.000812158	0.000715334	0.600179	no
110625998	NP_080676.3	DnaJ (Hsp40) homolog, subfamily B, member 11	0	1.88368e-05	0.0277078	yes
7657451	NP_056559.1	ectonucleotide pyrophosphatase/phosphodiesterase 2	0.000806217	0.000452616	0.345448	no
61097904	NP_598766.1	ectonucleotide pyrophosphatase/phosphodiesterase 3	0.000235716	0.000454164	0.753152	no
7106303	NP_034249.1	EH-domain containing 1	0	2.61771e-05	0.0277078	yes
31981592	NP_598599.2	EH-domain containing 4	4.33968e-05	0.000134171	0.0277078	yes
38142460	NP_080971.2	electron transferring flavoprotein, beta polypeptide	0	4.10947e-05	0.0277078	yes
22094995	NP_081378.1	endothelial cell-specific adhesion molecule	0	6.75173e-06	0.0277078	yes
6679675	NP_031972.1	eosinophil peroxidase	0	6.23199e-05	0.0277078	yes
6681249	NP_031920.1	eosinophil-associated, ribonuclease A family, member 1	0.000576765	8.04372e-05	0.115851	no
6753732	NP_034243.1	epidermal growth factor	0.0243522	0.00853397	0.463071	no
6753732	NP_034243.1	epidermal growth factor	0.00404681	0.00286408	0.248864	no
46560582	NP_997538.1	epidermal growth factor receptor isoform 1	1.95637e-05	1.65781e-05	0.248864	no
6681283	NP_031938.1	epidermal growth factor receptor isoform 2	7.88825e-05	2.4416e-05	0.463071	no
22122483	NP_666127.1	epidermal growth factor-containing fibulin-like extracellular matrix protein 1	0	2.84065e-05	0.0277078	yes
6679689	NP_031980.1	esterase 1	0.00119569	0.000752422	0.345448	no
126032329	NP_034236.2	eukaryotic translation elongation factor 1 alpha 1	2.56192e-05	0.000294089	0.115851	no
6681273	NP_031932.1	eukaryotic translation elongation factor 1 alpha 2	8.82909e-05	3.85495e-05	0.600179	no
110625979	NP_080283.3	eukaryotic translation elongation factor 1 gamma	0	4.8911e-05	0.0277078	yes
33859482	NP_031933.1	eukaryotic translation elongation factor 2	0	0.000176419	0.0277078	yes
21450625	NP_659207.1	eukaryotic translation initiation factor 4A1	0	5.16215e-05	0.0277078	yes
7305019	NP_038534.1	eukaryotic translation initiation factor 4A2	0	3.13314e-05	0.0277078	yes
31560771	NP_444477.2	extra cellular link domain-containing 1	0.000541454	0.000504382	0.753152	no
6681257	NP_031925.1	extracellular matrix protein 1	0	2.80282e-05	0.0277078	yes
27734847	NP_766235.1	F11 receptor	4.37197e-05	0	0.248864	no
61098124	NP_080896.2	family with sequence similarity 98, member B	7.2092e-05	0	0.248864	no
54112418	NP_849243.2	Fanconi anemia, complementation group M	7.80073e-06	5.0399e-06	0.248864	no
6754450	NP_034764.1	fatty acid binding protein 5, epidermal	0	0.000533081	0.0277078	yes
124487185	NP_001074641.1	FERM and PDZ domain containing 1	0	4.01869e-06	0.0277078	yes
144226227	NP_001077374.1	fetuin beta isoform 3	9.15159e-05	0.000149612	0.0277078	yes
33563252	NP_034326.1	fibrinogen, alpha polypeptide	0	4.30274e-05	0.0277078	yes
33859809	NP_862897.1	fibrinogen, B beta polypeptide	0	0.00229258	0.0277078	yes
19527078	NP_598623.1	fibrinogen, gamma polypeptide	2.71469e-05	0.00218022	0.0277078	yes
6753822	NP_034310.1	fibulin 1	0	0.000129912	0.0277078	yes
125347376	NP_034357.2	filamin, alpha	0.000130503	0.000835303	0.0277078	yes
46048490	NP_032025.2	flap structure specific endonuclease 1	0	1.77462e-05	0.0277078	yes
31982845	NP_032060.2	folate receptor 1 (adult)	0.000630455	0.000677286	0.345448	no
31541791	NP_080075.2	fucosidase, alpha-L- 2, plasma	0	1.35031e-05	0.0277078	yes
31541781	NP_077205.2	fucosidase, alpha-L-1, tissue	2.90175e-05	7.5564e-05	0.0277078	yes
33859554	NP_034339.1	fumarate hydratase 1	0	6.65046e-05	0.0277078	yes
6753814	NP_034306.1	fumarylacetoacetate hydrolase	0.000117304	6.38965e-05	0.345448	no
30425246	NP_780704.1	G protein-coupled receptor 150	0	2.34889e-05	0.0277078	yes
22267464	NP_671750.1	G protein-coupled receptor, family C, group 5, member C	0.000299262	4.05646e-05	0.115851	no
6753190	NP_033882.1	galactosidase, beta 1	0.000181435	6.94396e-05	0.345448	no
93102411	NP_032105.2	galactosylceramidase	0.000345736	0.000156121	0.248864	no
6679995	NP_032142.1	gamma-glutamyltransferase 1	0.00210436	0.00141921	0.753152	no
28916693	NP_666232.2	gelsolin	0.00154748	0.00394292	0.0463995	yes
110227379	NP_031625.2	gelsolin-like capping protein	0.00010325	0.000411134	0.0277078	yes
29789239	NP_083640.1	glucosamine (N-acetyl)-6-sulfatase	0.000445689	7.89429e-05	0.463071	no
6680067	NP_032181.1	glucose phosphate isomerase 1	6.49503e-05	9.14792e-05	0.248864	no
6996917	NP_032088.1	glucose-6-phosphate dehydrogenase X-linked	7.10555e-05	0.000181049	0.0277078	yes
6680027	NP_032159.1	glutamate dehydrogenase 1	0	1.20852e-05	0.0277078	yes
6754034	NP_034454.1	glutamate oxaloacetate transaminase 1, soluble	0	2.16083e-05	0.0277078	yes
6754036	NP_034455.1	glutamate oxaloacetate transaminase 2, mitochondrial	6.10042e-05	0.000159974	0.248864	no
33468897	NP_034425.1	glutamate-cysteine ligase, catalytic subunit	1.85809e-05	0	0.248864	no
31982332	NP_032157.2	glutamine synthetase	1.69605e-05	0.000249971	0.0277078	yes
6679653	NP_031960.1	glutamyl aminopeptidase	2.50499e-05	0	0.248864	no
34328489	NP_034474.3	glutathione reductase 1	0	2.09583e-05	0.0277078	yes
6754090	NP_034492.1	glutathione S-transferase omega 1	0	0.000849998	0.0277078	yes
6680117	NP_032206.1	glutathione synthetase	2.76707e-05	0	0.248864	no
6679937	NP_032110.1	glyceraldehyde-3-phosphate dehydrogenase	0	0.000534972	0.0277078	yes
6679939	NP_032111.1	glyceraldehyde-3-phosphate dehydrogenase, spermatogenic	3.97284e-05	0	0.248864	no
33468855	NP_032160.1	glycosylation dependent cell adhesion molecule 1	0.00176003	0.0017677	0.753152	no
7710028	NP_057905.1	glypican 1	0.000188772	0.000235031	0.753152	no
6680059	NP_032176.1	glypican 4	8.96661e-05	0.00037114	0.115851	no
47271396	NP_034439.2	GNAS complex locus isoform a	2.5805e-05	0	0.172955	no
6677905	NP_033175.1	golgi apparatus protein 1	0.000151074	4.1739e-05	0.115851	no
6680107	NP_032201.1	granulin	0	1.22835e-05	0.0277078	yes
51172612	NP_032122.1	group specific component	0	2.41783e-05	0.0277078	yes
9506715	NP_062394.1	growth arrest specific 6	3.5174e-05	1.63348e-05	0.345448	no
6753960	NP_034396.1	guanine deaminase	2.88897e-05	0.00036544	0.0277078	yes
6680047	NP_032169.1	guanine nucleotide binding protein (G protein), beta polypeptide 2 like 1	0	3.30573e-05	0.0277078	yes
41054806	NP_032164.2	guanine nucleotide binding protein, alpha inhibiting 2	0	0.000227286	0.0277078	yes
84000001	NP_796111.2	guanine nucleotide binding protein, alpha stimulating, olfactory type isoform 2	8.4242e-05	0	0.172955	no
6680045	NP_032168.1	guanine nucleotide-binding protein, beta-1 subunit	0	6.89507e-05	0.0277078	yes
13937391	NP_034442.1	guanine nucleotide-binding protein, beta-2 subunit	7.71524e-05	6.89507e-05	0.248864	no
31542899	NP_038559.2	guanine nucleotide-binding protein, beta-4 subunit	0	2.62477e-05	0.0277078	yes
116089273	NP_032138.3	guanosine diphosphate (GDP) dissociation inhibitor 2	2.65979e-05	0	0.248864	no
7106331	NP_034566.1	H2A histone family, member X	0	9.07429e-05	0.0277078	yes
8850219	NP_059066.1	haptoglobin	0.000151192	0.00124975	0.0277078	yes
31981722	NP_071705.2	heat shock 70kD protein 5 (glucose-regulated protein)	0.000253553	0.00127649	0.115851	no
124339829	NP_034609.2	heat shock 70kDa protein 1A	0.00487978	0.0027933	0.345448	no
124339838	NP_038586.2	heat shock 70kDa protein 1-like	7.32532e-05	8.60025e-05	0.345448	no
7305173	NP_038588.1	heat shock protein 1	0	0.000133182	0.0277078	yes
6754254	NP_034610.1	heat shock protein 1, alpha	1.61474e-05	0.00466617	0.0277078	yes
40556608	NP_032328.2	heat shock protein 1, beta	1.63481e-05	0.000319207	0.0277078	yes
50345978	NP_001002012.1	heat shock protein 2	0	0.000110534	0.0277078	yes
31981690	NP_112442.2	heat shock protein 8	0.000516553	0.0014499	0.0277078	yes
50355943	NP_938040.1	helicase with zinc finger domain	0	5.59457e-06	0.0277078	yes
6680179	NP_032245.1	hemoglobin Z, beta-like embryonic chain	0	6.07089e-05	0.0277078	yes
31982300	NP_032246.2	hemoglobin, beta adult major chain	0.000788927	1.3756e-05	0.345448	no
23956086	NP_059067.1	hemopexin	0.000771184	0.0011141	0.248864	no
9506779	NP_062320.1	hepatocyte growth factor activator	0	1.90657e-05	0.0277078	yes
34304034	NP_899080.1	hepcidin antimicrobial peptide 2	0	0.000122063	0.0277078	yes
6754222	NP_034578.1	heterogeneous nuclear ribonucleoprotein A/B isoform 2	0	0.000102298	0.0277078	yes
116256518	NP_001070734.1	heterogeneous nuclear ribonucleoprotein D isoform b	0	0.000106841	0.0277078	yes
13384620	NP_079555.1	heterogeneous nuclear ribonucleoprotein K	0	4.36361e-05	0.0277078	yes
67514549	NP_034551.2	hexosaminidase A	0	1.37027e-05	0.0277078	yes
6754186	NP_034552.1	hexosaminidase B	4.41644e-05	0.000560259	0.0277078	yes
16716461	NP_444406.1	histidine-rich glycoprotein	0	6.6304e-05	0.0277078	yes
133778955	NP_034510.3	histocompatibility 2, D region locus 1	0	9.31431e-05	0.0277078	yes
6754132	NP_034521.1	histocompatibility 2, Q region locus 10	0.000359272	0.000436742	0.753152	no
21426893	NP_064418.1	histone 1, H1b	0	0.000120057	0.0277078	yes
9845257	NP_056601.1	histone 1, H1c	0.000256628	0.000964609	0.0277078	yes
34328365	NP_663759.2	histone 1, H1d	0.000118696	0.000611745	0.172955	no
13430890	NP_056602.1	histone 1, H1e	5.14451e-05	0.00138843	0.0277078	yes
30061387	NP_835504.1	histone 1, H2bh	0	7.08271e-05	0.0277078	yes
68226433	NP_783597.2	histone 2, H2bb	0.000130781	0.00133711	0.0277078	yes
46049029	NP_996765.1	histone 3, H2bb	0.00031542	0.0025884	0.0277078	yes
31980953	NP_062418.2	hydroxyacid oxidase (glycolate oxidase) 3	0.000174901	8.52388e-05	0.172955	no
70887767	NP_849253.2	hypermethylated in cancer 2	1.91213e-05	0	0.248864	no
24418883	NP_722477.1	hypothetical protein LOC208659	0	2.48798e-05	0.0277078	yes
85702059	NP_001028936.1	hypothetical protein LOC210940	1.07328e-05	0	0.248864	no
22122641	NP_666231.1	hypothetical protein LOC227737	0	1.39909e-05	0.0277078	yes
22165388	NP_666261.1	hypothetical protein LOC230579	0	1.4678e-05	0.0277078	yes
124487435	NP_001074584.1	hypothetical protein LOC233038	0	0.000125142	0.0277078	yes
31981920	NP_666327.2	hypothetical protein LOC234728	0	7.18007e-06	0.0277078	yes
30425250	NP_780706.1	hypothetical protein LOC238880	0	0.00263645	0.0277078	yes
85702085	NP_001028947.1	hypothetical protein LOC432613	1.56464e-05	0.000443958	0.0277078	yes
51921343	NP_001004170.1	hypothetical protein LOC432987 (keratin)	0.00228686	0.000140708	0.248864	no
70794816	NP_001020559.1	hypothetical protein LOC433182	0.00115835	0.0026352	0.0747355	no
70909314	NP_001020745.1	hypothetical protein LOC433492	0.000100136	0.000271533	0.0277078	yes
13385274	NP_080082.1	hypothetical protein LOC66857	0	3.24517e-05	0.0277078	yes
13385840	NP_080612.1	hypothetical protein LOC67719	0.00220625	0.000539208	0.115851	no
19526926	NP_598493.1	hypothetical protein LOC70984	3.75748e-05	0	0.248864	no
21312626	NP_082294.1	hypothetical protein LOC71955	0.000267737	8.13429e-05	0.248864	no
30725720	NP_849216.1	hypothetical protein LOC98870	0	1.19838e-05	0.0277078	yes
6754374	NP_036173.1	immunoglobulin superfamily containing leucine-rich repeat	3.06446e-05	1.45443e-05	0.248864	no
70608131	NP_083949.2	inner membrane protein, mitochondrial	0	1.3843e-05	0.0277078	yes
132626295	NP_032427.2	integrin alpha M isoform 2 precursor	0	2.01484e-05	0.0277078	yes
111607447	NP_032430.2	integrin beta 2	4.01655e-05	0.00152712	0.0277078	yes
9055252	NP_061216.1	inter alpha-trypsin inhibitor, heavy chain 4	0	7.68047e-06	0.0277078	yes
21389311	NP_034623.1	intercellular adhesion molecule	0.000106247	0.00106007	0.0277078	yes
56785428	NP_001008700.1	interleukin 4 receptor, alpha	0	7.68513e-06	0.0277078	yes
7710042	NP_057930.1	IQ motif containing GTPase activating protein 1	0	0.000183317	0.0277078	yes
58037546	NP_034627.2	isocitrate dehydrogenase 1 (NADP+), soluble	0.000162526	0.000539398	0.172955	no
27370516	NP_766599.1	isocitrate dehydrogenase 2 (NADP+), mitochondrial	0.000108739	5.85302e-05	0.600179	no
28395018	NP_034723.1	junction plakoglobin	0.000142713	0.00022152	0.248864	no
31980868	NP_034769.4	kallikrein 1	0.00166568	0.00256062	0.753152	no
33469049	NP_777355.1	kallikrein related-peptidase 14	0	6.31312e-05	0.0277078	yes
88014720	NP_032405.3	karyopherin (importin) beta 1	0	2.3925e-05	0.0277078	yes
6754480	NP_034792.1	keratin 13	0.00501064	0.0117015	0.115851	no
21489935	NP_058654.1	keratin 14	0.0026087	0.0190433	0.115851	no
6680602	NP_032495.1	keratin 15	0.000557464	0.00668628	0.0277078	yes
6680604	NP_032496.1	keratin 16	0.00178472	0.0194049	0.0277078	yes
7106335	NP_034793.1	keratin 17	0.00216249	0.0122937	0.345448	no
6754482	NP_034794.1	keratin 18	0.000243311	0.00175398	0.115851	no
6680606	NP_032497.1	keratin 19	0.000349543	0.00440263	0.115851	no
21592285	NP_075745.1	keratin 20	0	0.00193836	0.0277078	yes
47679095	NP_997648.1	keratin 42	0.00053897	0	0.248864	no
20911031	NP_081287.1	keratin 5	0.00410089	0.0087505	0.345448	no
54607171	NP_032502.3	keratin 6A	0.00540494	0.0207169	0.115851	no
14861854	NP_149064.1	keratin 7	0	0.00202077	0.0277078	yes
47059013	NP_997650.1	keratin 73	0.00254215	0.000315563	0.115851	no
29789317	NP_579935.1	keratin 75	0	0.00152147	0.0277078	yes
85701680	NP_001028349.1	keratin 76	0.00113772	0.00170307	0.463071	no
51092293	NP_001003667.1	keratin 77	0.0108476	0.00484822	0.172955	no
33563238	NP_032500.1	keratin 84	0	5.06408e-05	0.0277078	yes
112983636	NP_034790.2	keratin complex 1, acidic, gene 10	0.034957	0.00841649	0.0747355	no
118130981	NP_034791.2	keratin complex 1, acidic, gene 12	7.51408e-05	0	0.248864	no
41054848	NP_957707.1	keratin complex 1, acidic, gene 9	5.98465e-05	0	0.248864	no
31980832	NP_058575.2	keratin complex 2, basic gene 18	0.000303489	0	0.248864	no
126116585	NP_032499.2	keratin complex 2, basic, gene 1	0.0142089	0.0082467	0.248864	no
124487419	NP_034798.2	keratin complex 2, basic, gene 17	0.00184201	0.000468815	0.172955	no
133778953	NP_032501.2	keratin complex 2, basic, gene 4	0.000311953	0.00135763	0.115851	no
113195684	NP_034799.2	keratin complex 2, basic, gene 6b	0.00589455	0.0248722	0.0463995	yes
114145561	NP_112447.2	keratin complex 2, basic, gene 8	0.000491579	0.00298029	0.0277078	yes
125490388	NP_997652.3	keratin Kb40	0.00399768	0.00184103	0.115851	no
6754406	NP_034724.1	kidney androgen regulated protein	0.000849401	0.000206275	0.463071	no
41235784	NP_958763.1	kininogen 2	0.000629931	0.000130302	0.0277078	yes
7705570	NP_038851.1	klotho	0	7.13511e-06	0.0277078	yes
6754524	NP_034829.1	lactate dehydrogenase A	3.56508e-05	0.000301475	0.172955	no
6678674	NP_032518.1	lactate dehydrogenase B	0.000117808	0.000187421	0.248864	no
31560677	NP_032548.2	lactotransferrin	0.00832093	0.0294814	0.0277078	yes
113865981	NP_032510.2	laminin, beta 3	0	0.000306558	0.0277078	yes
31791057	NP_034813.1	laminin, gamma 1	0	6.8409e-06	0.0277078	yes
110624798	NP_032511.3	laminin, gamma 2	0	0.000185184	0.0277078	yes
46849705	NP_034836.1	lectin, galactose binding, soluble 4	4.02328e-05	0	0.248864	no
6755144	NP_035280.1	lectin, galactoside-binding, soluble, 3 binding protein	0.00116322	0.00318177	0.172955	no
7242187	NP_035305.1	legumain	0	1.66322e-05	0.0277078	yes
27734076	NP_775555.1	leprecan-like 1	0	1.49063e-05	0.0277078	yes
31981147	NP_077754.2	leucine aminopeptidase 3	6.84165e-05	0.000344553	0.0277078	yes
9789997	NP_062668.1	leucine zipper-EF-hand containing transmembrane protein 1	0	2.83988e-05	0.0277078	yes
16418335	NP_084072.1	leucine-rich alpha-2-glycoprotein	0.00211456	0.00747511	0.172955	no
116734870	NP_032543.2	leukotriene A4 hydrolase	3.8425e-05	0.000126238	0.0277078	yes
34328049	NP_032517.1	lipocalin 2	0	0.000335583	0.0277078	yes
113865991	NP_032515.2	lipopolysaccharide-binding protein	0	5.29383e-05	0.0277078	yes
124487013	NP_001074841.1	liver carboxylesterase N-like	0	1.76892e-05	0.0277078	yes
124487372	NP_001074557.1	low density lipoprotein receptor-related protein 2	0.00115762	0.000489555	0.0747355	no
31541815	NP_076226.2	L-specific multifunctional beta-oxdiation protein	4.94543e-05	1.3969e-05	0.248864	no
6754584	NP_034872.1	lymphocyte antigen 6 complex, locus D	0	0.000115912	0.0277078	yes
6754588	NP_034875.1	lymphocyte antigen 86	0	2.45089e-05	0.0277078	yes
31543113	NP_032905.2	lymphocyte cytosolic protein 1	0.000416281	0.0014899	0.0277078	yes
63054837	NP_001017959.1	lysosomal membrane glycoprotein 2 isoform 1	0	2.5251e-05	0.0277078	yes
8393739	NP_059068.1	lysozyme	0.000892246	0.000165225	0.172955	no
7305247	NP_038618.1	lysozyme	7.99733e-05	0	0.248864	no
57222278	NP_001009550.1	major urinary protein	0.00126048	0.000387892	0.345448	no
13654245	NP_112465.1	major urinary protein 1	0	0.000940082	0.0277078	yes
113930714	NP_001039015.1	major urinary protein 2	0	0.00813046	0.0277078	yes
88196796	NP_001034633.1	major urinary protein 3	0.0209348	0.0226844	0.916512	no
6678968	NP_032674.1	major urinary protein 4	0	0.000384688	0.0277078	yes
31982178	NP_032644.2	malate dehydrogenase 1, NAD (soluble)	7.08746e-05	0.000407601	0.0277078	yes
31982186	NP_032643.2	malate dehydrogenase 2, NAD (mitochondrial)	0	0.000153688	0.0277078	yes
6678790	NP_032575.1	mannosidase 2, alpha 1	1.02922e-05	0	0.248864	no
113195690	NP_034894.2	mannosidase 2, alpha B1	0.00015987	0.000244054	0.600179	no
6678792	NP_032576.1	mannosidase alpha class 2B member 2	0	1.07989e-05	0.0277078	yes
42476097	NP_766536.2	mannoside acetylglucosaminyltransferase 5, isoenzyme B	3.80833e-05	0	0.248864	no
111955033	NP_034940.2	matrix metallopeptidase 7	0	2.33144e-05	0.0277078	yes
31982184	NP_032637.2	matrix metallopeptidase 8	0	3.11183e-05	0.0277078	yes
7305277	NP_038627.1	matrix metallopeptidase 9	0.000127099	0.00106943	0.0277078	yes
31982602	NP_077225.3	matrix-remodelling associated 8	0.000187643	7.55822e-05	0.753152	no
31543255	NP_032630.2	membrane metallo endopeptidase	0.00270287	0.00139368	0.345448	no
31982199	NP_032611.2	meprin 1 alpha	0.098024	0.0528405	0.172955	no
6678862	NP_032612.1	meprin 1 beta	0.00402261	0.00147083	0.0463995	yes
77627973	NP_062695.2	methyltransferase-like 3	9.23351e-06	6.13679e-05	0.0277078	yes
113865979	NP_032620.2	milk fat globule-EGF factor 8 protein isoform 1	0.00130187	0.00119259	0.753152	no
21489933	NP_036082.1	mitogen activated protein kinase 3	0	1.77462e-05	0.0277078	yes
31982582	NP_598542.2	MO25 protein	0	4.76678e-05	0.0277078	yes
70778915	NP_034963.2	moesin	0	0.000247683	0.0277078	yes
124378015	NP_536705.2	mucin 4	0	2.96709e-05	0.0277078	yes
31982171	NP_032671.2	murinoglobulin 1	0	2.03857e-05	0.0277078	yes
6678938	NP_032654.1	mutS homolog 2	0	1.12077e-05	0.0277078	yes
6754732	NP_034954.1	myeloperoxidase	0.000659082	0.00260999	0.0277078	yes
124053459	NP_056557.2	myosin IXb	0	7.75223e-06	0.0277078	yes
88196800	NP_001034635.1	myosin VI	0	4.12594e-05	0.0277078	yes
29336026	NP_082297.1	myosin, heavy polypeptide 14	0	1.57819e-05	0.0277078	yes
114326446	NP_071855.2	myosin, heavy polypeptide 9, non-muscle isoform 1	6.69179e-06	0.000134805	0.0747355	no
6753138	NP_033851.1	Na+/K+ -ATPase beta 1 subunit	0.000350861	5.43022e-05	0.248864	no
6680744	NP_031528.1	Na+/K+ -ATPase beta 3 subunit	0	2.42574e-05	0.0277078	yes
9790019	NP_062708.1	N-acylsphingosine amidohydrolase (acid ceramidase) 1	0.0416074	0.00763799	0.463071	no
9055168	NP_061300.1	N-acylsphingosine amidohydrolase 2	0.000122728	4.59505e-05	0.345448	no
6680552	NP_032463.1	napsin A aspartic peptidase	0.0979761	0.0582044	0.0463995	yes
50363232	NP_057910.3	nestin	8.49304e-05	2.14763e-05	0.248864	no
40254580	NP_035006.2	neutrophil cytosolic factor 1	0	4.57652e-05	0.0277078	yes
6754798	NP_035007.1	neutrophil cytosolic factor 2	0	1.3781e-05	0.0277078	yes
114052444	NP_056594.2	neutrophil elastase	0	0.00016653	0.0277078	yes
6679054	NP_032720.1	neutrophilic granule protein	0	1.21858e-05	0.0277078	yes
31981205	NP_067620.2	nicastrin	0	1.80112e-05	0.0277078	yes
31543697	NP_061292.2	N-sulfoglucosamine sulfohydrolase (sulfamidase)	7.28955e-05	1.44124e-05	0.248864	no
84370357	NP_062371.2	olfactomedin 1 isoform a	0	4.53333e-05	0.0277078	yes
22129005	NP_667169.1	olfactory receptor 171	0	0.000272172	0.0277078	yes
6679182	NP_032794.1	orosomucoid 1	0.000190086	7.31844e-05	0.345448	no
6754950	NP_035146.1	orosomucoid 2	0	0.000193812	0.0277078	yes
18700026	NP_570955.1	oxidation resistance 1	0.000102001	4.04913e-05	0.600179	no
121674797	NP_032943.2	palmitoyl-protein thioesterase 1	0	2.0343e-05	0.0277078	yes
9506985	NP_062314.1	palmitoyl-protein thioesterase 2	8.68603e-05	0	0.248864	no
10946938	NP_067492.1	PDZ domain containing 1	0.00145288	0.000331837	0.0747355	no
113930726	NP_033013.3	pentraxin related	0	2.88539e-05	0.0277078	yes
6755018	NP_035191.1	peptidyl arginine deiminase, type IV	0	0.000131513	0.0277078	yes
7305367	NP_038654.1	peptidylglycine alpha-amidating monooxygenase	0	6.35848e-06	0.0277078	yes
75677555	NP_852060.1	peroxidasin	0	6.22846e-05	0.0277078	yes
31980726	NP_082408.2	phosphoglucomutase 2	4.17752e-05	2.57473e-05	0.248864	no
124486895	NP_001074743.1	phosphogluconate dehydrogenase	0.000166463	0.000767396	0.0277078	yes
70778976	NP_032854.2	phosphoglycerate kinase 1	0.00049214	0.0013331	0.0747355	no
31980752	NP_038765.2	phospholipase A2, group VII	0.000402618	0.00031006	0.172955	no
9790167	NP_062650.1	phospholipase C, delta 1	0	1.45414e-05	0.0277078	yes
6679525	NP_032987.1	phosphotriesterase related	7.51628e-05	2.87386e-05	0.345448	no
124286797	NP_083915.2	placenta expressed transcript 1	5.23948e-06	0.000146423	0.172955	no
9790163	NP_062736.1	plakophilin 3	0	2.62965e-05	0.0277078	yes
28570174	NP_788262.1	plasma glutamate carboxypeptidase	4.99524e-05	6.95709e-05	0.0277078	yes
31982113	NP_032903.2	plasminogen	0	3.70558e-05	0.0277078	yes
6679377	NP_032899.1	plasminogen activator, urokinase	0	1.6709e-05	0.0277078	yes
21704120	NP_663604.1	plastin 3 precursor	0	0.000148108	0.0277078	yes
31981570	NP_035212.2	polymeric immunoglobulin receptor	0.00326076	0.00209309	0.345448	no
118601009	NP_067524.2	polynucleotide kinase 3'- phosphatase	0	4.15805e-05	0.0277078	yes
82950147	XP_621314.2	PREDICTED: desmoplakin isoform 1	5.26614e-05	0.000369506	0.463071	no
94371480	XP_994726.1	PREDICTED: gamma-glutamyl hydrolase	0.000244944	0.000266467	0.753152	no
149263766	XP_001472141.1	PREDICTED: hypothetical protein	0.0127784	0.00766547	0.248864	no
82958195	XP_914999.1	PREDICTED: hypothetical protein	0	0.000133197	0.0277078	yes
94380483	XP_001004974.1	PREDICTED: hypothetical protein	0	0.000116698	0.0277078	yes
94397580	XP_985187.1	PREDICTED: hypothetical protein	0	0.000101248	0.0277078	yes
149249953	XP_001479846.1	PREDICTED: hypothetical protein	0	9.37362e-05	0.0277078	yes
94369475	XP_980250.1	PREDICTED: hypothetical protein	0	7.08051e-05	0.0277078	yes
149266068	XP_001477405.1	PREDICTED: hypothetical protein	0	4.63782e-05	0.0277078	yes
94386298	XP_486245.4	PREDICTED: hypothetical protein	0	3.6386e-05	0.0277078	yes
149269280	XP_001471527.1	PREDICTED: hypothetical protein	0	2.4389e-05	0.0277078	yes
149251518	XP_001473983.1	PREDICTED: hypothetical protein	0	1.93781e-05	0.0277078	yes
149262379	XP_001472661.1	PREDICTED: hypothetical protein	5.44926e-05	0	0.248864	no
149252769	XP_001477261.1	PREDICTED: hypothetical protein (major urinary protein 11 precursor)	0.0992498	0.0921052	0.600179	no
94378041	XP_001000460.1	PREDICTED: hypothetical protein isoform 1	0	0.000199603	0.0277078	yes
94395563	XP_995570.1	PREDICTED: hypothetical protein isoform 2	0	0.000176023	0.0277078	yes
94385843	XP_001004685.1	PREDICTED: hypothetical protein isoform 4	0	7.26795e-05	0.0277078	yes
82998325	XP_904967.1	PREDICTED: hypothetical protein isoform 7	0	3.29141e-05	0.0277078	yes
94388845	XP_919138.2	PREDICTED: hypothetical protein LOC380654	0	2.62423e-06	0.0277078	yes
82995771	XP_140451.6	PREDICTED: laminin, alpha 3 isoform 1	1.8575e-05	2.19805e-05	0.0277078	yes
149253088	XP_890015.3	PREDICTED: microtubule-actin crosslinking factor 1 isoform 2	0	1.35318e-06	0.0277078	yes
149255605	XP_001477220.1	PREDICTED: similar to [Human Ig rearranged gamma chain mRNA, V-J-C region and complete cds.], gene product	0	3.06568e-05	0.0277078	yes
82957963	XP_924795.1	PREDICTED: similar to 60S ribosomal protein L7 isoform 4	0	4.22547e-05	0.0277078	yes
83008262	XP_913818.1	PREDICTED: similar to Ab 414.2 heavy chain variable and joining region	1.3146e-05	0.000236152	0.0277078	yes
94383772	XP_996602.1	PREDICTED: similar to Acidic ribosomal phosphoprotein P0	0	3.30573e-05	0.0277078	yes
149234023	XP_001475491.1	PREDICTED: similar to ADAM23	9.28391e-05	0.000107042	0.248864	no
94405733	XP_979234.1	PREDICTED: similar to Aldehyde dehydrogenase 3 family, member B1	0.000287838	0.000252033	0.916512	no
83019564	XP_909693.1	PREDICTED: similar to Aldehyde dehydrogenase 3 family, member B1 isoform 4	0	2.20743e-05	0.0277078	yes
149252910	XP_001472913.1	PREDICTED: similar to aldehyde reductase	0	3.01494e-05	0.0277078	yes
149251454	XP_001481013.1	PREDICTED: similar to Amylase 2, pancreatic	0.0182915	0.00602296	0.0463995	yes
82936834	XP_912310.1	PREDICTED: similar to Angiotensin-converting enzyme, testis-specific isoform precursor (ACE-T) (Dipeptidyl carboxypeptidase I) (Kininase II)	0	1.39722e-05	0.0277078	yes
149267864	XP_001479188.1	PREDICTED: similar to apolipoprotein D	0	9.39391e-05	0.0277078	yes
149270685	XP_001478885.1	PREDICTED: similar to Aspartate aminotransferase, cytoplasmic (Transaminase A) (Glutamate oxaloacetate transaminase 1)	0	1.70292e-05	0.0277078	yes
94394730	XP_983435.1	PREDICTED: similar to Chain K, 2.9 Angstrom X-Ray Structure Of Hybrid Macroh2a Nucleosomes isoform 2	0	0.000300465	0.0277078	yes
149255641	XP_001476753.1	PREDICTED: similar to Chain L, Structural Basis Of Antigen Mimicry In A Clinically Relevant Melanoma Antigen System isoform 3	6.08609e-05	0.000265317	0.0277078	yes
149266012	XP_001475661.1	PREDICTED: similar to clusterin	0.0107729	0.00594354	0.916512	no
82917245	XP_890553.1	PREDICTED: similar to Cofilin-1 (Cofilin, non-muscle isoform) isoform 1	0	0.000153637	0.0277078	yes
149240657	XP_001474612.1	PREDICTED: similar to collagen, type VI, alpha 3	0	4.12502e-06	0.0277078	yes
94404718	XP_983525.1	PREDICTED: similar to Desmoglein-1 alpha precursor (Dsg1-alpha) (Desmoglein-1) (Desmosomal glycoprotein I) (DG1) (DGI) isoform 4	2.32222e-05	0.000192937	0.172955	no
94410850	XP_922855.2	PREDICTED: similar to Expressed sequence AI324046	0.00109528	8.68798e-05	0.248864	no
149265181	XP_909457.2	PREDICTED: similar to Filamin-B (FLN-B) (Beta-filamin) (Actin-binding-like protein) (ABP-280-like protein) isoform 7	0	6.34838e-05	0.0277078	yes
82930467	XP_889611.1	PREDICTED: similar to fusion protein: ubiquitin (bases 43_513); ribosomal protein S27a (bases 217_532)	0	0.000163486	0.0277078	yes
94372553	XP_978405.1	PREDICTED: similar to fusion protein: ubiquitin (bases 43_513); ribosomal protein S27a (bases 217_532)	0.00025561	0	0.248864	no
94380203	XP_001003154.1	PREDICTED: similar to Glucose phosphate isomerase 1 isoform 2	0	6.16513e-05	0.0277078	yes
149275059	XP_001473673.1	PREDICTED: similar to Glyceraldehyde-3-phosphate dehydrogenase (GAPDH)	0.000106952	0	0.248864	no
149261677	XP_001479381.1	PREDICTED: similar to Glyceraldehyde-3-phosphate dehydrogenase (GAPDH) isoform 2	0	0.000558628	0.0277078	yes
149258936	XP_001472584.1	PREDICTED: similar to Glyceraldehyde-3-phosphate dehydrogenase (GAPDH) isoform 2	0	9.9039e-05	0.0277078	yes
149265162	XP_001478578.1	PREDICTED: similar to Glyceraldehyde-3-phosphate dehydrogenase (GAPDH) isoform 5	7.87742e-05	6.02389e-05	0.345448	no
149266431	XP_001474440.1	PREDICTED: similar to Glyceraldehyde-3-phosphate dehydrogenase isoform 3	0	9.30147e-05	0.0277078	yes
94410061	XP_917657.2	PREDICTED: similar to heavy chain of the monoclonal antibody MST2	0	5.43836e-05	0.0277078	yes
94400765	XP_001004765.1	PREDICTED: similar to heterogeneous nuclear ribonucleoprotein A3, isoform 4	0	1.88895e-05	0.0277078	yes
94378251	XP_981474.1	PREDICTED: similar to histone H4	0.00192218	0.00438283	0.0277078	yes
82886628	XP_930842.1	PREDICTED: similar to Hydroxyacyl-Coenzyme A dehydrogenase/3-ketoacyl-Coenzyme A thiolase/enoyl-Coenzyme A hydratase (trifunctional protein), beta subunit	0	4.41228e-05	0.0277078	yes
94410325	XP_919726.2	PREDICTED: similar to idiotypic anti-NP IgG(1) heavy chain V-D-J	0.00130157	0.000380684	0.345448	no
149263750	XP_001001076.2	PREDICTED: similar to Ig gamma-2b chain membrane isoform 1	9.1294e-05	0.000787282	0.0277078	yes
83014383	XP_919074.1	PREDICTED: similar to Igh protein	0.000250641	0.000395012	0.248864	no
94411065	XP_994866.1	PREDICTED: similar to Igh protein	0	4.29307e-05	0.0277078	yes
149274201	XP_913961.3	PREDICTED: similar to Igh-1a protein	0.000448618	0.000277546	0.248864	no
94411120	XP_990061.1	PREDICTED: similar to Igh-1a protein	0.000217819	0.000117172	0.248864	no
149274558	XP_916509.3	PREDICTED: similar to Igh-1a protein	0.000416378	0	0.248864	no
149274960	XP_989135.2	PREDICTED: similar to Igh-6 protein	0	8.8773e-05	0.0277078	yes
149274921	XP_001475969.1	PREDICTED: similar to Igha protein	0	0.000250959	0.0277078	yes
149274822	XP_001474385.1	PREDICTED: similar to Ighg protein	0.000183439	0.00033772	0.0277078	yes
149274752	XP_001473175.1	PREDICTED: similar to Ighg1 protein	0	0.000602415	0.0277078	yes
149263794	XP_001473748.1	PREDICTED: similar to Immunogloblin heavy chain	9.66069e-06	0	0.248864	no
149263798	XP_001474075.1	PREDICTED: similar to immunoglobulin epsilon	0	0.00088443	0.0277078	yes
149263752	XP_001472591.1	PREDICTED: similar to immunoglobulin gamma 2A chain	0	5.70298e-05	0.0277078	yes
149263782	XP_908514.3	PREDICTED: similar to immunoglobulin gamma-1 chain	8.62889e-05	8.19073e-05	0.248864	no
149255578	XP_001476107.1	PREDICTED: similar to immunoglobulin kappa chain	0	6.8654e-05	0.0277078	yes
149266929	XP_915020.2	PREDICTED: similar to Lymphocyte antigen 6G precursor (Ly-6G) (Ly-6G.1)	0	6.76077e-05	0.0277078	yes
149252533	XP_001472105.1	PREDICTED: similar to major urinary protein 1	0.0869597	0.107098	0.463071	no
149252432	XP_001477054.1	PREDICTED: similar to major urinary protein 1	0.0557972	0.0411975	0.600179	no
149252547	XP_001472259.1	PREDICTED: similar to major urinary protein 1	0.0360563	0.028995	0.345448	no
149252527	XP_001477248.1	PREDICTED: similar to major urinary protein 1	0	0.0129902	0.0277078	yes
149261521	XP_909201.3	PREDICTED: similar to mKIAA0829 protein isoform 4	0	7.28731e-06	0.0277078	yes
149263705	XP_001477976.1	PREDICTED: similar to monoclonal anti-alpha-1,3-galactosyltransferase IgM heavy chain	0	0.000207512	0.0277078	yes
149274923	XP_916297.3	PREDICTED: similar to monoclonal antibody heavy chain	0	2.63769e-05	0.0277078	yes
149274486	XP_001472775.1	PREDICTED: similar to monoclonal antibody heavy chain	0.000590219	0	0.248864	no
94400195	XP_001003388.1	PREDICTED: similar to MSP23 isoform 2	0	0.000116739	0.0277078	yes
82893786	XP_915142.1	PREDICTED: similar to Predicted gene, OTTMUSG00000007485	0.0300585	0.0120029	0.916512	no
94371972	XP_915130.2	PREDICTED: similar to Predicted gene, OTTMUSG00000007485	0.00579119	0.000761231	0.345448	no
82994207	XP_916793.1	PREDICTED: similar to ribosomal protein L11	0	0.00010585	0.0277078	yes
149255946	XP_001473568.1	PREDICTED: similar to RIKEN cDNA 1100001H23 gene	0	4.91334e-05	0.0277078	yes
149266876	XP_001473952.1	PREDICTED: similar to splicing factor, arginine/serine-rich 3	0.000149539	4.60828e-05	0.248864	no
149249577	XP_922484.3	PREDICTED: similar to Thrombospondin 1	2.41876e-05	1.08264e-05	0.345448	no
94386017	XP_984804.1	PREDICTED: similar to ubiquitin A-52 residue ribosomal protein fusion product 1	0.000670612	0	0.172955	no
94408011	XP_990665.1	PREDICTED: similar to valosin isoform 1	0	0.000668126	0.0277078	yes
149274769	XP_001478965.1	PREDICTED: similar to VH coding region	0	2.79772e-06	0.0277078	yes
149250318	XP_981653.2	PREDICTED: similar to Zinc finger protein 341	0	5.78527e-06	0.0277078	yes
110347469	NP_031402.3	pregnancy zone protein	1.93934e-05	0.000824795	0.248864	no
31657132	NP_853557.1	premature ovarian failure 1B	0	1.14882e-05	0.0277078	yes
114158701	NP_083554.2	probable nucleolar complex protein 14	2.72996e-05	0	0.248864	no
125490382	NP_032814.2	procollagen C-proteinase enhancer protein	5.33162e-05	1.33012e-05	0.172955	no
134288882	NP_034058.2	procollagen, type XV	3.0032e-05	1.44001e-05	0.172955	no
6755106	NP_035252.1	procollagen-lysine, 2-oxoglutarate 5-dioxygenase 1	0	1.37772e-05	0.0277078	yes
6755040	NP_035202.1	profilin 1	0	0.000305189	0.0277078	yes
29244579	NP_080249.2	progastricsin (pepsinogen C)	6.69179e-05	1.588e-05	0.248864	no
46852193	NP_083596.2	progesterone-induced blocking factor 1 isoform a	3.98968e-05	0	0.248864	no
6755002	NP_035182.1	programmed cell death 6 interacting protein (ALIX)	0.000397394	0.00112513	0.345448	no
118601068	NP_032869.2	prolactin induced protein	0.000119185	0	0.248864	no
42415475	NP_035162.1	prolyl 4-hydroxylase, beta polypeptide	7.27389e-05	0.000762632	0.172955	no
6679479	NP_032961.1	prominin 1	0.000904343	0.00161438	0.172955	no
34328185	NP_035309.2	prosaposin	2.12496e-05	1.29892e-05	0.345448	no
119226208	NP_032989.2	prostaglandin H2 D-isomerase	0.000387233	0.00139551	0.0277078	yes
19111160	NP_579929.1	prostasin	0.00427775	0.0023479	0.115851	no
21312316	NP_082492.1	prostate stem cell antigen	0.00156135	0.00161697	0.753152	no
16716593	NP_444490.1	protease, serine, 29	0	0.000127049	0.0277078	yes
6679503	NP_032974.1	proteasome (prosome, macropain) 26S subunit, ATPase 3	0	1.52569e-05	0.0277078	yes
6754724	NP_034947.1	proteasome (prosome, macropain) 26S subunit, non-ATPase, 7	0	2.1008e-05	0.0277078	yes
6755198	NP_036098.1	proteasome (prosome, macropain) subunit, alpha type 6	0	4.25982e-05	0.0277078	yes
27754103	NP_080235.2	proteasome 26S ATPase subunit 6	0	1.73356e-05	0.0277078	yes
134053905	NP_848731.2	proteasome 26S non-ATPase subunit 11	0	4.794e-05	0.0277078	yes
6755210	NP_036005.1	proteasome 26S non-ATPase subunit 13	0	3.587e-05	0.0277078	yes
84042525	NP_032932.2	protective protein for beta-galactosidase isoform a	5.33167e-05	0.000117977	0.0277078	yes
112293264	NP_031978.2	protein disulfide isomerase associated 3	4.64904e-05	0.000314151	0.0277078	yes
58037267	NP_082235.1	protein disulfide isomerase-associated 6	0	6.20204e-05	0.0277078	yes
6679465	NP_032951.1	protein kinase C substrate 80K-H	0	2.01135e-05	0.0277078	yes
46309455	NP_035303.1	protein S (alpha)	0	1.48589e-05	0.0277078	yes
25092609	NP_035348.1	protein tyrosine phosphatase, receptor type, S	0	5.7738e-06	0.0277078	yes
31981542	NP_035308.2	proteinase 3	0	2.84843e-05	0.0277078	yes
6679573	NP_033015.1	purine rich element binding protein A	0	2.1008e-05	0.0277078	yes
6679261	NP_032836.1	pyruvate dehydrogenase E1 alpha 1	0	1.72912e-05	0.0277078	yes
31981562	NP_035229.2	pyruvate kinase, muscle	0.000193838	0.000918716	0.115851	no
68131562	NP_001020116.1	quiescin Q6 sulfhydryl oxidase 1 isoform a	0.000440139	0.00186518	0.0277078	yes
7710086	NP_057885.1	RAB10, member RAS oncogene family	0	0.00017214	0.0277078	yes
6679583	NP_033023.1	RAB11B, member RAS oncogene family	0	9.6139e-05	0.0277078	yes
21313162	NP_083852.1	RAB1B, member RAS oncogene family	0	0.00020854	0.0277078	yes
6755262	NP_035359.1	RAB5B, member RAS oncogene family	0	4.87403e-05	0.0277078	yes
6677699	NP_033067.1	radixin	0.000570417	0.000695736	0.753152	no
112421060	NP_033126.2	repetin	0	3.17203e-05	0.0277078	yes
86198296	NP_079619.3	required for meiotic nuclear division 1 homolog	8.30307e-05	0.00211047	0.0277078	yes
31982030	NP_598557.3	Rho GDP dissociation inhibitor (GDI) alpha	0	5.13684e-05	0.0277078	yes
31981892	NP_666236.2	Rho GTPase activating protein 1	0	2.28469e-05	0.0277078	yes
21311883	NP_080887.1	ribonuclease T2B	0	7.21037e-05	0.0277078	yes
83699424	NP_033103.2	ribosomal protein L18	0	0.000222961	0.0277078	yes
30794450	NP_077174.1	ribosomal protein L4	0	7.32932e-05	0.0277078	yes
7305445	NP_038675.1	ribosomal protein S16	0	0.000232484	0.0277078	yes
6755372	NP_036182.1	ribosomal protein S3	0	0.000224973	0.0277078	yes
6677805	NP_033120.1	ribosomal protein S4, X-linked	0	3.98447e-05	0.0277078	yes
31560560	NP_035159.2	ribosomal protein SA	0	0.00031935	0.0277078	yes
6677837	NP_033140.1	S100 calcium binding protein A9 (calgranulin B)	0	0.000934709	0.0277078	yes
6678113	NP_033289.1	secreted phosphoprotein 1	0.000604107	0.000102648	0.345448	no
22164798	NP_033176.2	selenium binding protein 1	0.000185687	1.04088e-05	0.115851	no
9507079	NP_062287.1	selenium binding protein 2	0	4.01567e-05	0.0277078	yes
119226253	NP_033180.2	semaphorin 5A	2.20411e-05	3.73548e-05	0.0277078	yes
6678079	NP_033269.1	serine (or cysteine) proteinase inhibitor, clade A, member 1a	0	0.00112116	0.0277078	yes
76881807	NP_033270.3	serine (or cysteine) proteinase inhibitor, clade A, member 1b	0.00229858	0.00323735	0.0277078	yes
6678083	NP_033271.1	serine (or cysteine) proteinase inhibitor, clade A, member 1c	0.00218373	0.00118707	0.345448	no
6678085	NP_033272.1	serine (or cysteine) proteinase inhibitor, clade A, member 1d	0.00212381	0.000731828	0.753152	no
6678087	NP_033273.1	serine (or cysteine) proteinase inhibitor, clade A, member 1e	0.00126517	0.00275927	0.0277078	yes
33859636	NP_035588.1	serine (or cysteine) proteinase inhibitor, clade A, member 3K	0.00139106	0.00259438	0.0277078	yes
130503301	NP_033278.2	serine (or cysteine) proteinase inhibitor, clade A, member 3N	9.73382e-05	0.000207703	0.248864	no
6680856	NP_031644.1	serine (or cysteine) proteinase inhibitor, clade A, member 6	0	0.000167249	0.0277078	yes
114158675	NP_079705.2	serine (or cysteine) proteinase inhibitor, clade B, member 1a	0.000329005	0.000930066	0.345448	no
41235743	NP_958751.1	serine (or cysteine) proteinase inhibitor, clade B, member 3C	0	2.71481e-05	0.0277078	yes
6678103	NP_033283.1	serine (or cysteine) proteinase inhibitor, clade B, member 5	0	0.000107897	0.0277078	yes
117606335	NP_035470.3	serine (or cysteine) proteinase inhibitor, clade F, member 1	0.000571188	0.000416517	0.248864	no
6679383	NP_032904.1	serine (or cysteine) proteinase inhibitor, clade F, member 2	0	2.04272e-05	0.0277078	yes
6753218	NP_033906.1	serine (or cysteine) proteinase inhibitor, clade G, member 1	0	2.18122e-05	0.0277078	yes
89337277	NP_067512.3	serine/threonine kinase 25	0	1.46126e-05	0.0277078	yes
31543707	NP_033206.2	sialyltransferase 7B	0	5.00666e-05	0.0277078	yes
9910572	NP_064347.1	signal transducer and activator of transcription 2	0	6.44916e-05	0.0277078	yes
124486606	NP_001074488.1	similar to H3 histone, family 3B	0	1.83466e-05	0.0277078	yes
40254165	NP_083163.2	SMC hinge domain containing 1	0	1.8469e-05	0.0277078	yes
14547897	NP_062288.1	solute carrier family 12, member 3	9.45938e-05	4.27984e-05	0.345448	no
21450131	NP_659034.1	solute carrier family 22 (organic anion transporter), member 19	0	9.10142e-05	0.0277078	yes
22094075	NP_031477.1	solute carrier family 25, member 5	0	0.000288946	0.0277078	yes
21312508	NP_082340.1	solute carrier family 39, member 4	0	4.74781e-05	0.0277078	yes
6755566	NP_036160.1	solute carrier family 9 (sodium/hydrogen exchanger), isoform 3 regulator 1	0.00133429	0.000687233	0.0463995	yes
22128627	NP_666238.1	sorbitol dehydrogenase	6.98935e-05	5.61892e-05	0.345448	no
62510083	NP_001014973.1	sorting nexin 13	1.5488e-05	0	0.248864	no
115496850	NP_001070022.1	spectrin alpha 2	0	1.36038e-05	0.0277078	yes
6755582	NP_035551.1	sphingomyelin phosphodiesterase 1, acid lysosomal	0	0.000126291	0.0277078	yes
19527104	NP_598649.1	sphingomyelin phosphodiesterase, acid-like 3B	0	3.97016e-05	0.0277078	yes
23956214	NP_076092.1	splicing factor proline/glutamine rich (polypyrimidine tract binding protein associated)	0	1.49916e-05	0.0277078	yes
47679086	NP_001001332.1	stefin A1-like protein	0	9.29605e-05	0.0277078	yes
134023662	NP_061224.2	stratifin	0	0.000260393	0.0277078	yes
6755600	NP_035565.1	superoxide dismutase 3, extracellular	0	4.32359e-06	0.0277078	yes
19526912	NP_598487.1	suppression of tumorigenicity 13	0	1.81767e-05	0.0277078	yes
6677921	NP_033186.1	surfactant associated protein D	0.00021083	0.000765078	0.0277078	yes
31980672	NP_082166.2	sushi domain containing 2	5.77369e-05	0.000165985	0.0277078	yes
7949150	NP_058087.1	syndecan binding protein	0	4.17782e-05	0.0277078	yes
6755809	NP_035732.1	talin 1	0	3.11653e-05	0.0277078	yes
124486801	NP_001074777.1	TAO kinase 3	2.61444e-05	6.93202e-06	0.248864	no
110625624	NP_038714.2	t-complex protein 1	0	2.29351e-05	0.0277078	yes
124249335	NP_758508.2	testis expressed gene 10	3.27507e-05	6.71986e-06	0.172955	no
19072792	NP_083848.1	thioredoxin domain containing 4	0	0.000165601	0.0277078	yes
47059073	NP_035710.2	thrombospondin 1	3.50753e-05	1.18023e-05	0.463071	no
117606366	NP_065582.3	thymidylate kinase family LPS-inducible member	0	6.03451e-05	0.0277078	yes
33859640	NP_035658.1	transaldolase 1	0	0.00153403	0.0277078	yes
7657639	NP_056564.1	transcobalamin 2	3.05021e-05	0	0.248864	no
20330802	NP_598738.1	transferrin	0.000969789	0.00338457	0.0277078	yes
6678359	NP_033414.1	transketolase	0	0.00041212	0.0277078	yes
10181182	NP_065651.1	transmembrane protein 27	0.000725206	0.000616735	0.753152	no
115385968	NP_848831.2	transportin 1 isoform 1	0	1.16694e-05	0.0277078	yes
10946884	NP_067456.1	trehalase	0.000122955	0.000127734	0.753152	no
6753448	NP_034036.1	tripeptidyl-peptidase I	9.94231e-05	0.000145118	0.463071	no
84781771	NP_001034085.1	trypsin 10	0.00235331	0.000670956	0.916512	no
27370092	NP_766333.1	Tu translation elongation factor, mitochondrial	0	5.13961e-05	0.0277078	yes
6755901	NP_035783.1	tubulin, alpha 1	5.2488e-05	0.000317857	0.172955	no
34740335	NP_035784.1	tubulin, alpha 1B	2.90818e-05	0.000158301	0.248864	no
6678469	NP_033474.1	tubulin, alpha 1C	0	2.2338e-05	0.0277078	yes
6678467	NP_033473.1	tubulin, alpha 4	0.000366529	0.000560707	0.248864	no
33859488	NP_033476.1	tubulin, beta 2	0	4.50776e-05	0.0277078	yes
22165384	NP_666228.1	tubulin, beta 2c	0.000471496	0.000599099	0.248864	no
31981939	NP_033477.2	tubulin, beta 4	0	0.000118009	0.0277078	yes
7106439	NP_035785.1	tubulin, beta 5	0.000181084	0.000602272	0.172955	no
6755863	NP_035761.1	tumor rejection antigen gp96	3.85629e-05	0.00020733	0.172955	no
11230780	NP_068684.1	tumor susceptibility gene 101 protein	0.000193883	9.88207e-05	0.0747355	no
31560359	NP_064431.2	tumor-associated calcium signal transducer 2	0	7.06982e-05	0.0277078	yes
31543974	NP_061223.2	tyrosine 3-monooxygenase/tryptophan 5-monooxygenase activation protein, beta polypeptide	0	0.000191967	0.0277078	yes
31981925	NP_033562.2	tyrosine 3-monooxygenase/tryptophan 5-monooxygenase activation protein, epsilon polypeptide	0	0.000149864	0.0277078	yes
6756041	NP_035870.1	tyrosine 3-monooxygenase/tryptophan 5-monooxygenase activation protein, zeta polypeptide	0	0.000260613	0.0277078	yes
46593021	NP_079683.2	ubiquinol-cytochrome c reductase core protein 1	0	0.000219402	0.0277078	yes
9845265	NP_063936.1	ubiquitin A-52 residue ribosomal protein fusion product 1	0.000556616	0.000725781	0.600179	no
7305619	NP_038728.1	ubiquitin specific protease 5 (isopeptidase T)	0	1.22135e-05	0.0277078	yes
6678483	NP_033483.1	ubiquitin-activating enzyme E1, Chr X	0	9.6746e-05	0.0277078	yes
11602910	NP_071641.1	UDP-Gal:betaGlcNAc beta 1,4- galactosyltransferase, polypeptide 1	3.28719e-05	3.37342e-05	0.0277078	yes
22128623	NP_033496.1	uromodulin	0.0596101	0.0210415	0.0463995	yes
58037127	NP_081091.1	uroplakin 1A	0	4.07749e-05	0.0277078	yes
121949819	NP_033502.2	uroplakin 2	0	5.69519e-05	0.0277078	yes
12963693	NP_075967.1	uroplakin 3A	0	0.000211471	0.0277078	yes
13928670	NP_075373.1	vacuolar protein sorting 35	0	1.31648e-05	0.0277078	yes
6677981	NP_033216.1	vacuolar protein sorting 4b	0.000156552	1.40202e-05	0.463071	no
30023842	NP_033529.2	valosin containing protein	0	0.000190211	0.0277078	yes
6755979	NP_035834.1	vanin 1	0	2.14713e-05	0.0277078	yes
31981430	NP_035823.2	vascular cell adhesion molecule 1	6.40035e-05	3.29729e-05	0.753152	no
31981693	NP_647468.2	vasorin	9.19092e-05	3.26696e-05	0.248864	no
23956096	NP_062363.1	vesicle docking protein	0	3.27815e-05	0.0277078	yes
6678573	NP_033535.1	villin 1	2.86241e-05	0	0.248864	no
83921618	NP_033536.2	villin 2	0.00410196	0.0034961	0.600179	no
31982755	NP_035831.2	vimentin	0.000176415	0.000899059	0.463071	no
31543942	NP_033528.3	vinculin	9.19116e-05	0.000270938	0.463071	no
6755987	NP_035837.1	vitronectin	2.47616e-05	3.50907e-05	0.248864	no
6755963	NP_035824.1	voltage-dependent anion channel 1	0.00105726	0.000576567	0.115851	no
6755995	NP_035845.1	WD repeat domain 1	0	2.75645e-05	0.0277078	yes
133778994	NP_573476.2	X-prolyl aminopeptidase (aminopeptidase P) 2, membrane-bound isoform 1	1.75609e-05	0	0.248864	no
66793418	NP_796333.2	zinc finger protein	3.62309e-05	2.41449e-05	0.345448	no
		Grey = detected in human exosomes: https://hpcwebapps.cit.nih.gov/ESBL/Database/Exosome/, Hiemstra et al, 2014, JASN (PMID: 24700864), and Pisitkun et al, 2004, PNAS (PMID: 15326289)
